# Supplementary material for: Insights into the Structure of the Highly Glycosylated Ffase from Rhodotorula dairenensis Enhance Its Biotechnological Potential
Source: MDPI journal article supplement (doi:10.3390/ijms232314981), 2022-11-29
Supplement: s1 [file s1]

## SUPPLEMENTARY MATERIAL

### **Insights into the structure of the highly-glycosylated Ffase from *Rhodotorula dairenensis* enhance its biotechnological potential**

Elena Jiménez-Ortega<sup>a^</sup>, Egle Narmontaite<sup>b^</sup>, Beatriz González-Pérez<sup>a</sup>, Francisco J. Plou<sup>c</sup>  
María Fernández-Lobato<sup>b\*</sup> and Julia Sanz-Aparicio<sup>a\*</sup>

<sup>a</sup> Department of Crystallography and Structural Biology, Institute of Physical-Chemistry Rocasolano, CSIC, 28006 Madrid, Spain

<sup>b</sup> Department of Molecular Biology, Centre of Molecular Biology Severo Ochoa, CSIC-UAM, 28049 Madrid, Spain

<sup>c</sup> Institute of Catalysis and Petrochemistry, CSIC, 28049 Madrid, Spain

\*Corresponding authors: xjulia@iqfr.csic.es; mfernandez@cbm.csic.es

^These authors contributed equally to this work

**Table S1.** Crystallographic statistics (values in parentheses are for the high-resolution shell).

| Crystal data                                               | InvRd wt<br>PEG/GOL,<br>GOL/Bis-Tris | D188A-RdINV $\Delta_{21-139}$<br>/FRU/Bis-Tris | D188A-RdINV $\Delta_{21-139}$<br>/SUC | D188A-RdINV $\Delta_{21-139}$<br>/RAF |
|------------------------------------------------------------|--------------------------------------|------------------------------------------------|---------------------------------------|---------------------------------------|
| Space group                                                | C222 <sub>1</sub>                    | P2 <sub>1</sub>                                | P2 <sub>1</sub>                       | P2 <sub>1</sub>                       |
| Unit cell parameters                                       |                                      |                                                |                                       |                                       |
| a, b, c (Å)                                                | 103.38, 108.24, 196.60               | 80.85, 112.69, 139.62                          | 80.34, 112.81, 139.08                 | 81.01, 114.54, 139.16                 |
| $\alpha, \beta, \gamma$ (°)                                | 90.00, 90.00, 90.00                  | 90.00, 104.89, 90.00                           | 90.00, 104.74, 90.00                  | 90.00, 104.58, 90.00                  |
| <b>Data collection</b>                                     |                                      |                                                |                                       |                                       |
| Beamline                                                   | ALBA<br>XALOC                        | ALBA<br>XALOC                                  | ALBA<br>XALOC                         | ALBA<br>XALOC                         |
| Temperature (K)                                            | 100                                  | 100                                            | 100                                   | 100                                   |
| Wavelength (Å)                                             | 0.979257                             | 0.979257                                       | 0.979264                              | 0.979264                              |
| Resolution (Å)                                             | 47.41 -2.07<br>(2.12 - 2.07)         | 45.70-1.86<br>(1.89 – 1.86)                    | 45.65 - 2.38<br>(2.42 - 2.38)         | 46.25 – 2.27<br>(2.31 – 2.27)         |
| <b>Data processing</b>                                     |                                      |                                                |                                       |                                       |
| Total reflections                                          | 367663 (23880)                       | 1122695 (57382)                                | 647026 (33979)                        | 775924 (39278)                        |
| Unique reflections                                         | 66921 (4459)                         | 202338 (10039)                                 | 96053 (4777)                          | 113410 (5618)                         |
| Multiplicity                                               | 5.5 (5.4)                            | 5.5 (5.7)                                      | 6.7 (7.1)                             | 6.8 (7.0)                             |
| Completeness (%)                                           | 99.5 (99.9)                          | 99.9 (100.0)                                   | 99.8 (99.7)                           | 99.9 (99.9)                           |
| Mean I/ $\sigma$ (I)                                       | 9.9 (3.5)                            | 14.0 (2.8)                                     | 11.8 (3.5)                            | 9.1 (2.9)                             |
| $R_{\text{merge}}^{\dagger}$ (%)                           | 14.5 (66.6)                          | 7.1 (61.2)                                     | 11.4 (67.8)                           | 13.2 (68.9)                           |
| $R_{\text{pim}}^{\ddagger}$ (%)                            | 6.9 (32.1)                           | 3.3 (28.2)                                     | 4.7 (27.8)                            | 5.5 (27.9)                            |
| CC1/2 (%)                                                  | 99.3 (74.1)                          | 99.8 (83.3)                                    | 99.6 (87.6)                           | 99.3 (86.6)                           |
| Molecules per ASU                                          | 2                                    | 4                                              | 4                                     | 4                                     |
| <b>Refinement</b>                                          |                                      |                                                |                                       |                                       |
| $R_{\text{work}} / R_{\text{free}}^{\ddagger\ddagger}$ (%) | 17.17/20.92                          | 18.48/21.42                                    | 18.43/22.22                           | 20.61/24.70                           |
| <b>N° of atoms/average B (Å<sup>2</sup>)</b>               |                                      |                                                |                                       |                                       |
| Protein                                                    | 8172/24.03                           | 16191/27.20                                    | 16146/39.12                           | 16133/50.68                           |
| Ligands                                                    | 474/44.53                            | 958/50.37                                      | 883/64.35                             | 920/75.58                             |
| Water Molecules                                            | 599/29.94                            | 1980/34.66                                     | 694/36.83                             | 561/45.48                             |
| All atoms                                                  | 9245/25.46                           | 19129/29.14                                    | 17723/40.28                           | 17614/51.82                           |
| <b>Ramachandran plot (%)</b>                               |                                      |                                                |                                       |                                       |
| Favoured                                                   | 96                                   | 96                                             | 96                                    | 96                                    |
| Outliers                                                   | 0                                    | 0                                              | 0                                     | 1                                     |
| <b>RMS deviations</b>                                      |                                      |                                                |                                       |                                       |
| Bonds (Å)                                                  | 0.0085                               | 0.0050                                         | 0.0085                                | 0.0065                                |
| Angles (°)                                                 | 1.4249                               | 1.3812                                         | 1.4391                                | 1.4445                                |
| <b>PDB accession codes</b>                                 | 8BEQ                                 | 8BES                                           | 8BET                                  | 8BEU                                  |

$R_{\text{merge}}^{\dagger} = \sum_{\text{hkl}} \sum_i |I_i(\text{hkl}) - [I(\text{hkl})]| / \sum_{\text{hkl}} \sum_i I_i(\text{hkl})$ , where  $I_i(\text{hkl})$  is the  $i$ th measurement of reflection  $\text{hkl}$  and  $[I(\text{hkl})]$  is the weighted mean of all measurements.

$R_{\text{pim}}^{\ddagger} = \sum_{\text{hkl}} [1/(N - 1)]^{1/2} \sum_i |I_i(\text{hkl}) - [I(\text{hkl})]| / \sum_{\text{hkl}} \sum_i I_i(\text{hkl})$ , where  $N$  is the redundancy for the  $\text{hkl}$  reflection.

**Table S2.** Binding affinity change caused by the mutation ( $\Delta\Delta G$  value above 0.5 is destabilizing).

| RdINV Variant | $\Delta\Delta G^{\#}$ (kcal/mol) |
|---------------|----------------------------------|
| WT            | 0                                |
| A213W         | 1.9                              |
| Q216L         | 1.6                              |
| Q216T         | 0.1                              |
| A213W/Q216L   | 1.4                              |
| A360Q         | 0.9                              |
| N387T         | 2.2                              |
| A360Q/N387T   | 2.3                              |

**Table S3.** Oligonucleotides employed in this study

| Mutant                  | Orientation | Sequence                                      |
|-------------------------|-------------|-----------------------------------------------|
| A213W                   | F           | CGTCTGGGGGAACCAGCACTGGGGAC                    |
|                         | R           | TTCCCCCAGACGTACTCGAGCGGGTTGTAC                |
| Q216L                   | F           | GGAAC <b>TTG</b> CACTGGGGACACGCCACTTC         |
|                         | R           | CAGTGCA <b>AGT</b> TCCCGGCGACGTACTCG          |
| Q216T                   | F           | GGAAC <b>ACT</b> CACTGGGGACACGCCACTTC         |
|                         | R           | CAGTG <b>AGT</b> GTTCCCGGCGACGTACTCG          |
| A213W/ Q216L            | F           | <b>CTGGGGGAAC</b> <b>TTG</b> CACTGGGGACACGCCA |
|                         | R           | GCAAGTTCCCCCAGACGTACTCGAGCGGGTTG              |
| A360Q                   | F           | GGACTCCAATACGAATGTCCGA <b>ACT</b> TGGTCCAGG   |
|                         | R           | CGTAT <b>TGG</b> GAGTCCGAGCAAACCGTGGTGC       |
| N387T                   | F           | GATCA <b>CT</b> TCCCGGCGCGCCACTCGG            |
|                         | R           | CCGGG <b>AGT</b> GATCGAAATGTACATGAGCCAGGCC    |
| D188A                   | F           | GAAC <b>GCT</b> CCGAACGGTTGCCACCG             |
|                         | R           | TCGGAG <b>CGT</b> TCATGAATCCCTTCGGCG          |
| RdINV $\Delta_{21-139}$ | F           | GCCATCGCCGCCGCGGCTTCAGACTCGTATGCTAGCAGCTCG    |
|                         | R           | TCTTGCGCTCC<br>GATACGTGCCGTTGCGGTTCG          |

Substitutions are marked in bold.

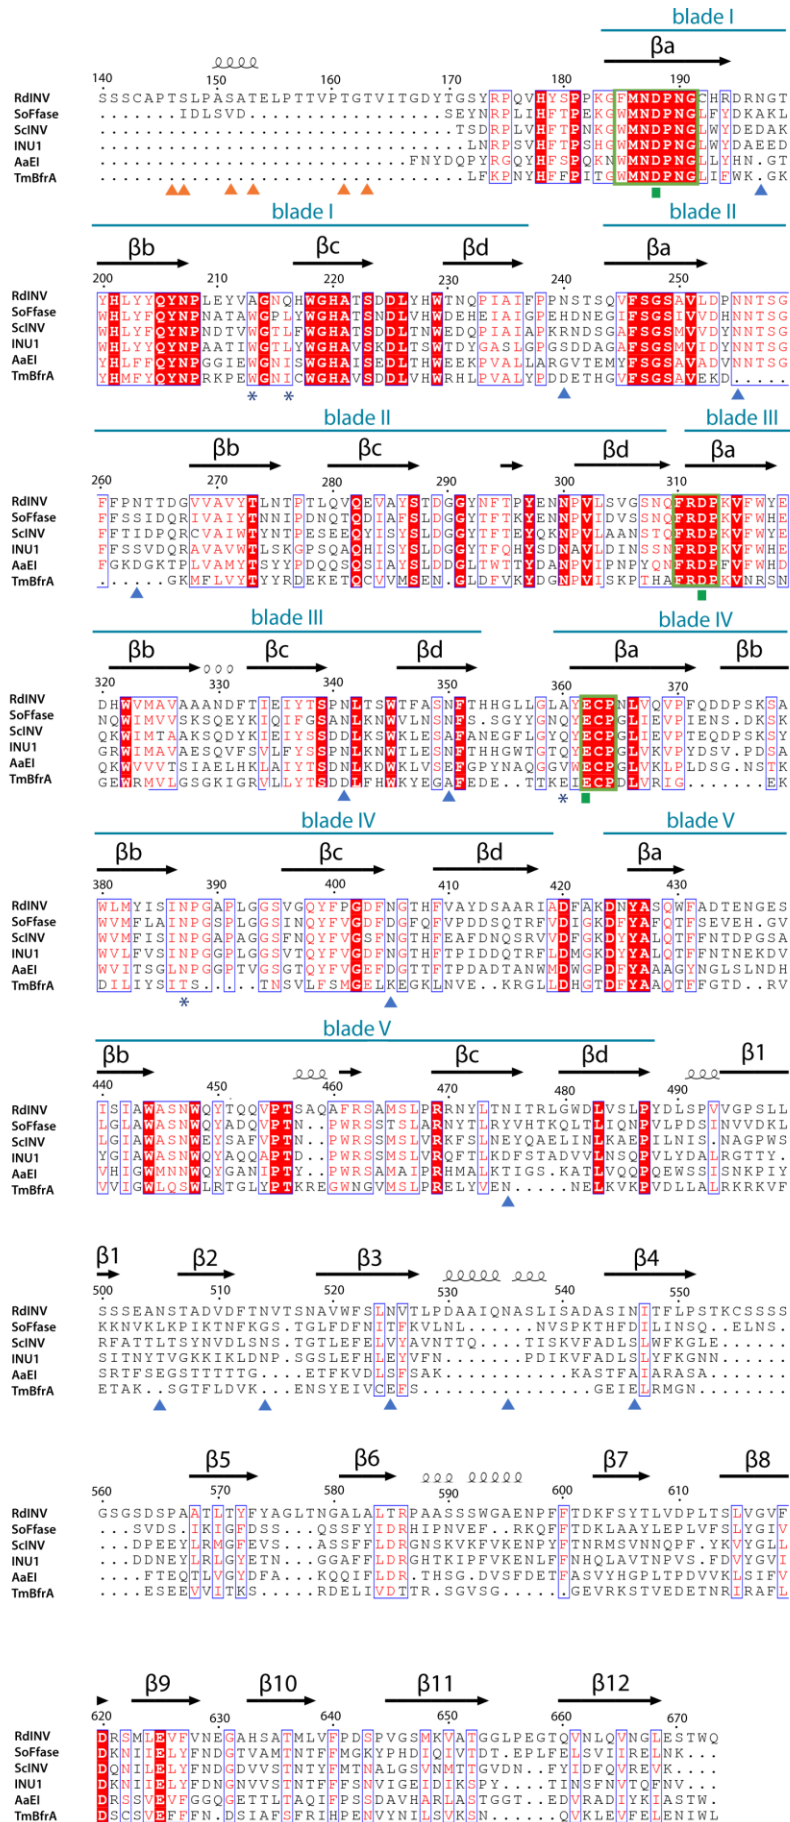

**Figure S1. Sequence comparison of RdINV with homologues.** Structural alignment of RdINV superimposed to Ffase from *Schwanniomyces occidentalis* (SoFfase, PDB code 3KF5), Invertase from *Saccharomyces cerevisiae* (ScINV, PDB code 4EQV), Exoinulinase INU1 from *Kluyveromyces marxianus* (INU1, PDB code 6JOT), Exoinulinase from *Aspergillus awamori* (AaEI, PDB code 1Y4W) and Invertase from *Thermotoga maritima* (TmBfrA, PDB code 1UYP) using DALI server and ESPript 3.0 (<http://esprict.ibcp.fr>) representation. Blades (I-V) from  $\beta$ -propeller catalytic domain are in blue. Conserved GH32 motifs are boxed in green. Green squares indicate catalytic residues and asterisks mark residues mutated in this work. O-glycosylation and N-Glycosylation sites are represented as orange and blue triangles, respectively.

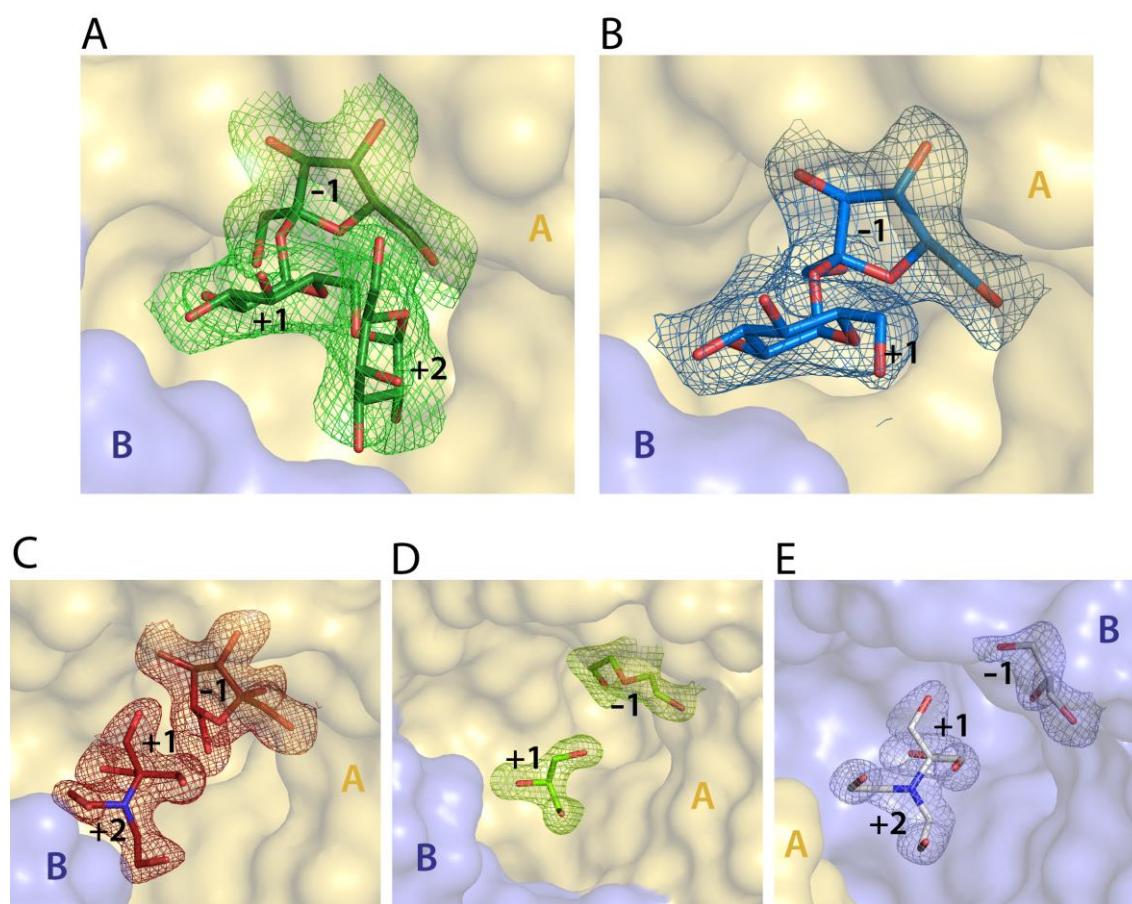

**Figure S2. Ligands bound at RdINV active site in the crystals.** Surface representation of D188A-RdINV $\Delta$ 21–139 complexed with (A) raffinose (green), (B) sucrose (marine) and (C) fructose (firebrick). (D) Surface representation of wild type RdINV active site complexed with a PEG and a glycerol molecule (lime) and (E) a glycerol and a Bis-Tris molecule (grey). Chain A is colored in yellow and chain B in slate. The 2FoFc electron density maps are contoured at 1 $\sigma$ .

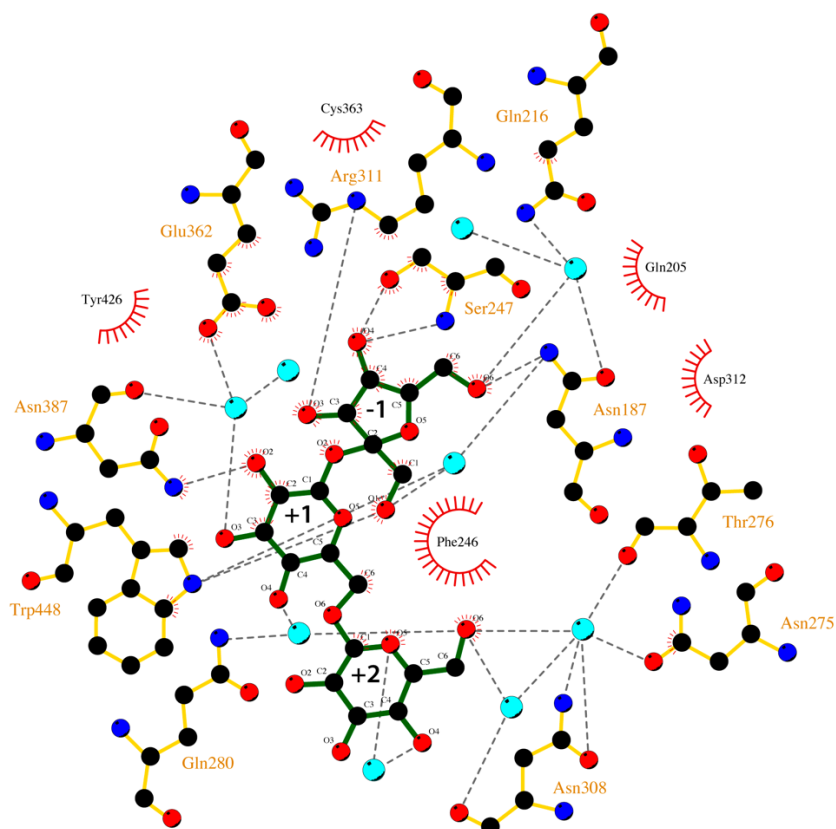

**Figure S3. Schematic diagram of the atomic interactions made by raffinose at the RdINV active site.** The figure was made by using LigPlot<sup>+</sup> (Laskowski R A, Swindells M B (2011). LigPlot<sup>+</sup>: multiple ligand-protein interaction diagrams for drug discovery. *J. Chem. Inf. Model.*, **51**, 2778-2786).

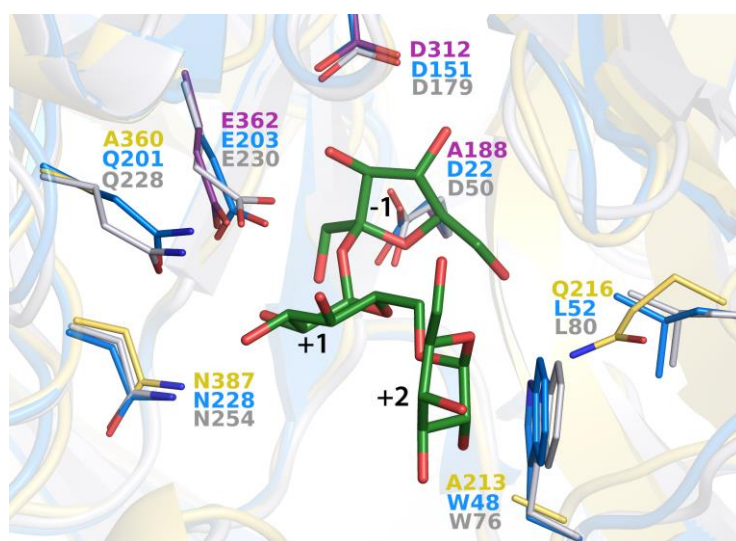

**Figure S4. Comparison of RdINV active site with its homologues.** Structural superposition of ScINV (PDB code 4EQV, marine) and SoFfase (PDB code 3KF5, gray) onto D188A-RdINV $\Delta_{21-139}$  (yellow) complexed with raffinose (green). The catalytic residues are colored in magenta.

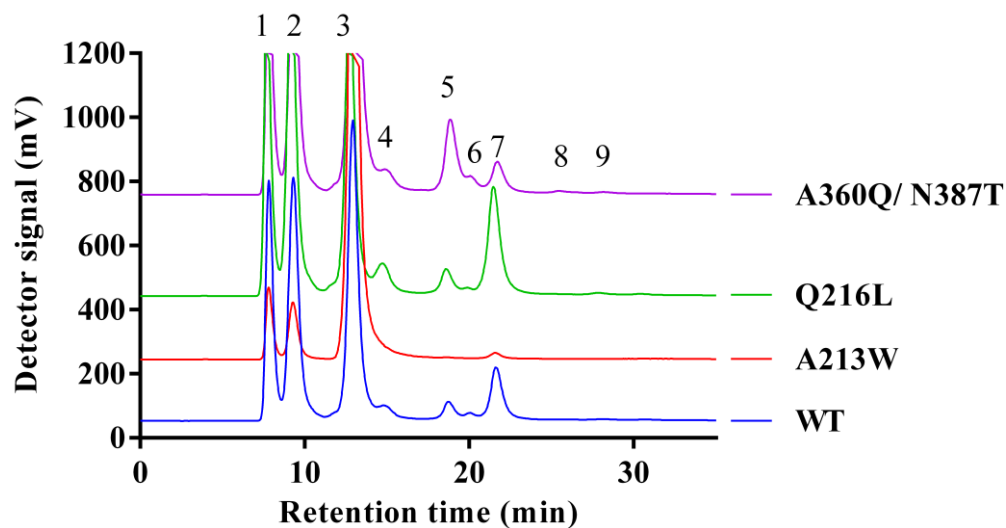

**Figure S5. Irreversible thermal inactivation of the RdINV variants at 60<sup>o</sup> C.** The protein variants were incubated at 60<sup>o</sup> C, and then their hydrolytic activity measured after 2, 4, 6, 12 and 24 hours of incubation. Data were measured in triplicate and standard errors are represented.

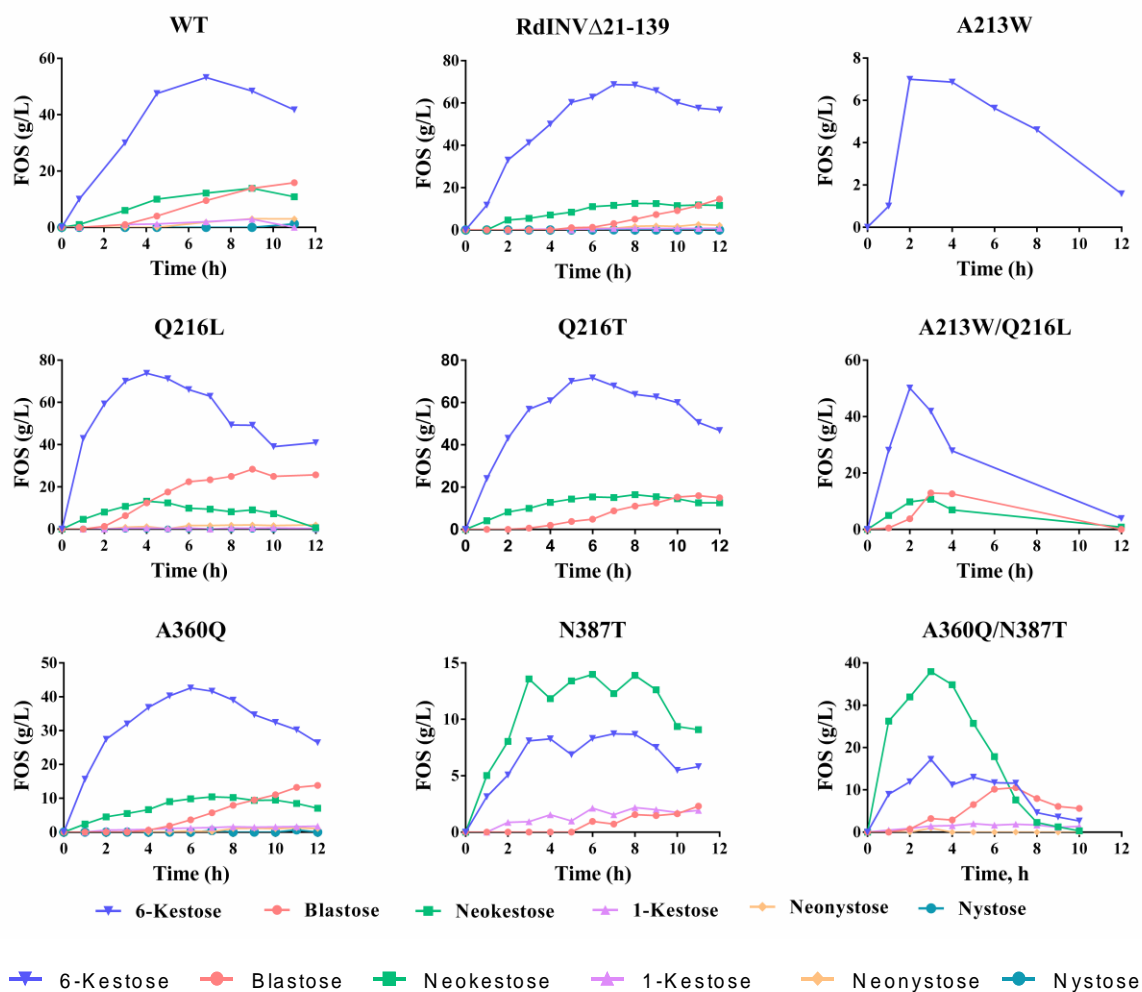

**Figure S6. Transfructosylation productivity of the RdINV variants.** Progress of transfructosylation reactions of the referred RdINV variants. Reaction conditions: 600 g/L sucrose at 60 °C, using 0.5- 5 U/mL of hydrolytic activity.
